# Supplementary material for: Beneficial effects of water in the colloidal synthesis of InP/ZnS core–shell quantum dots for optoelectronic applications
Source: Royal Society of Chemistry journal article supplement (doi:10.1039/c6nr04713k), 2016-01-01
Supplement: c6nr04713k1.pdf [file c6nr04713k1.pdf]

## Supporting Information

### Beneficial Effects of Water in the Colloidal Synthesis of InP/ZnS Core-Shell Quantum Dots for Optoelectronic Applications

*Parthiban Ramasamy,<sup>a</sup> Bumjin Kim,<sup>a</sup> Min-Sang Lee<sup>b</sup> and Jong-Soo Lee<sup>a,\*</sup>*

<sup>a</sup>Department of Energy Systems Engineering, DGIST, Daegu, 711-873, Republic of Korea

<sup>b</sup>Ecolumy Co., Ltd. University-Industry Cooperation Center, DGIST, Daegu, Republic of Korea

**Table S1.** Water content measurements for different reaction systems using Karl Fisher titration

| Reaction system | Measurement 1<br>(ppm) | Measurement 1<br>(ppm) |
|-----------------|------------------------|------------------------|
| With water      | 1807                   | 1770                   |
| Without water   | 82                     | 80                     |
| Only Tech OAm   | 274                    | 257                    |

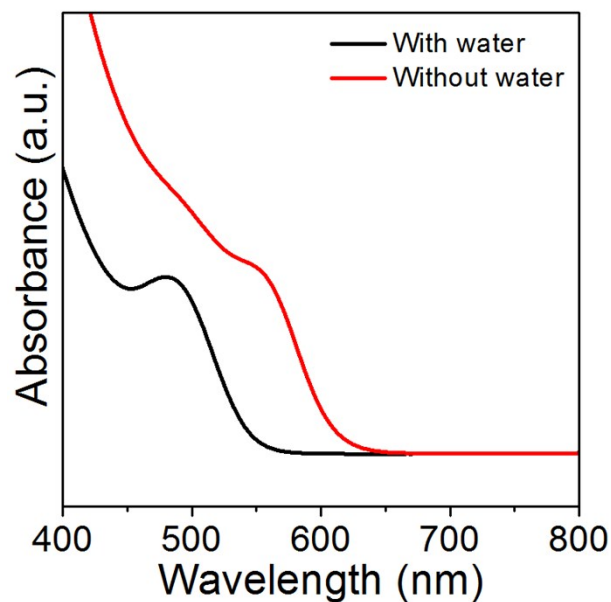

**Fig. S1** Uv-vis absorption spectra of InP core QDs synthesized with and without water at 185 °C for 15 min.

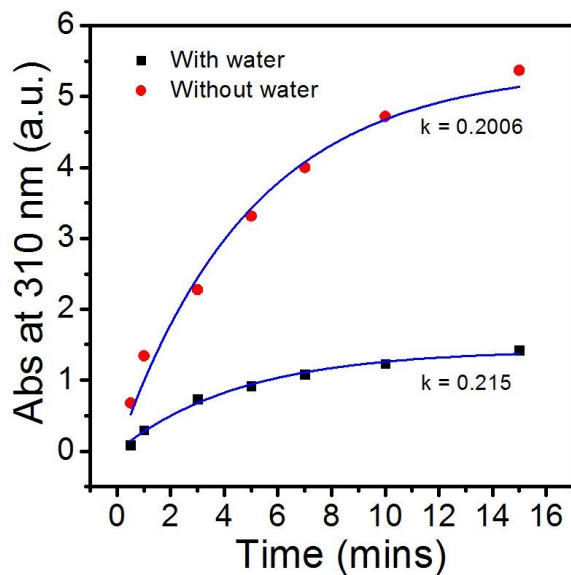

**Fig. S2** Measured absorbance at 310 nm for the InP QDs synthesized with and without water. The data is fitted with rate equation  $y = A \cdot (1 - \exp(-kt))$  to obtain rate constant. Where,  $A$  = max yield, here the absorbance number is taken as yield.  $k$  is rate constant and  $t$  is time. This is an approximate value, since we did not calculate the exact concentration of InP QDs at each time.

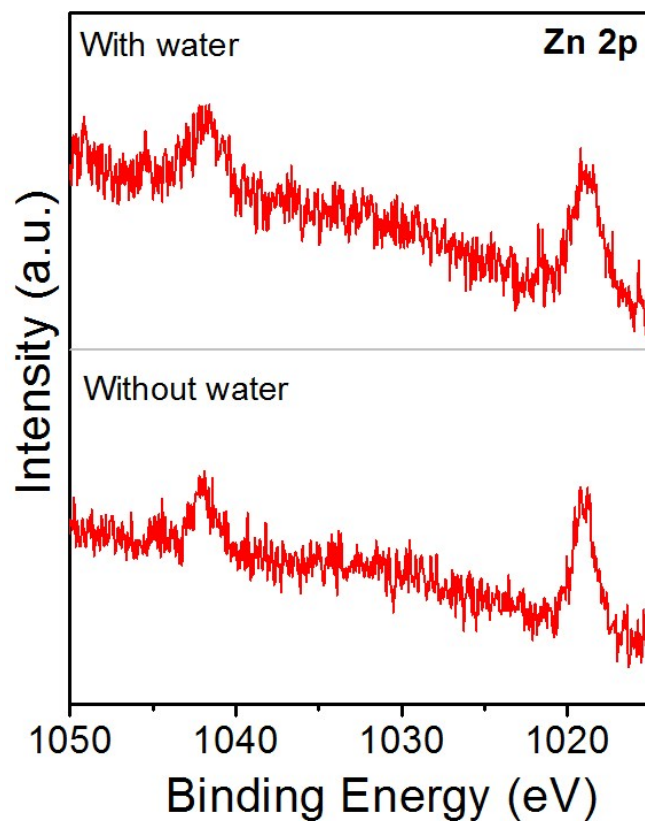

**Fig. S3** Zn 2p XPS spectra of InP core QDs synthesized with and without water.

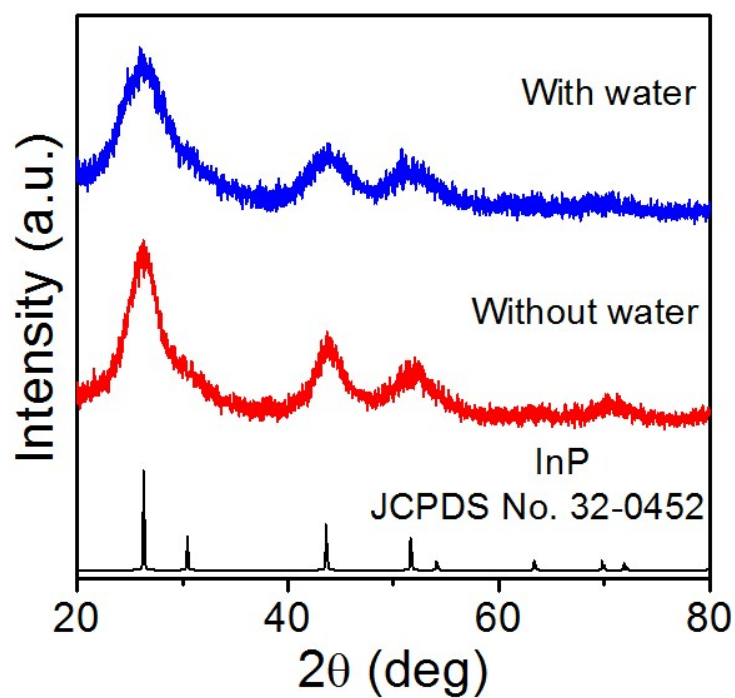

**Fig. S4** XRD patterns of InP core QDs synthesized with and without water.

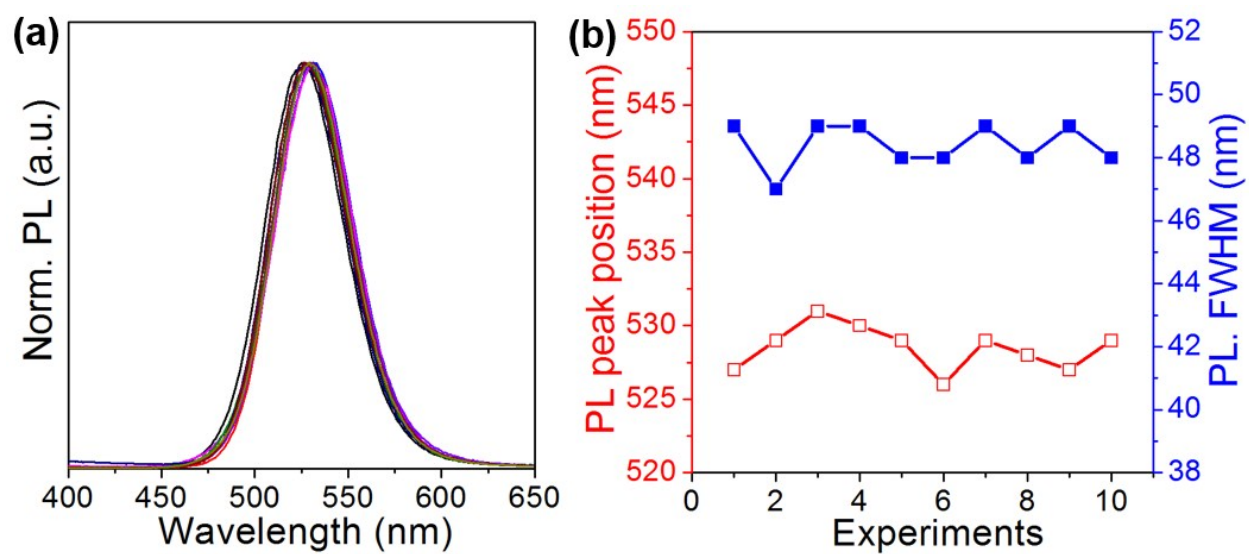

**Fig. S5** PL spectra, peak position and FWHM of InP/ZnS QDs synthesized with water for 10 consecutive experiments.



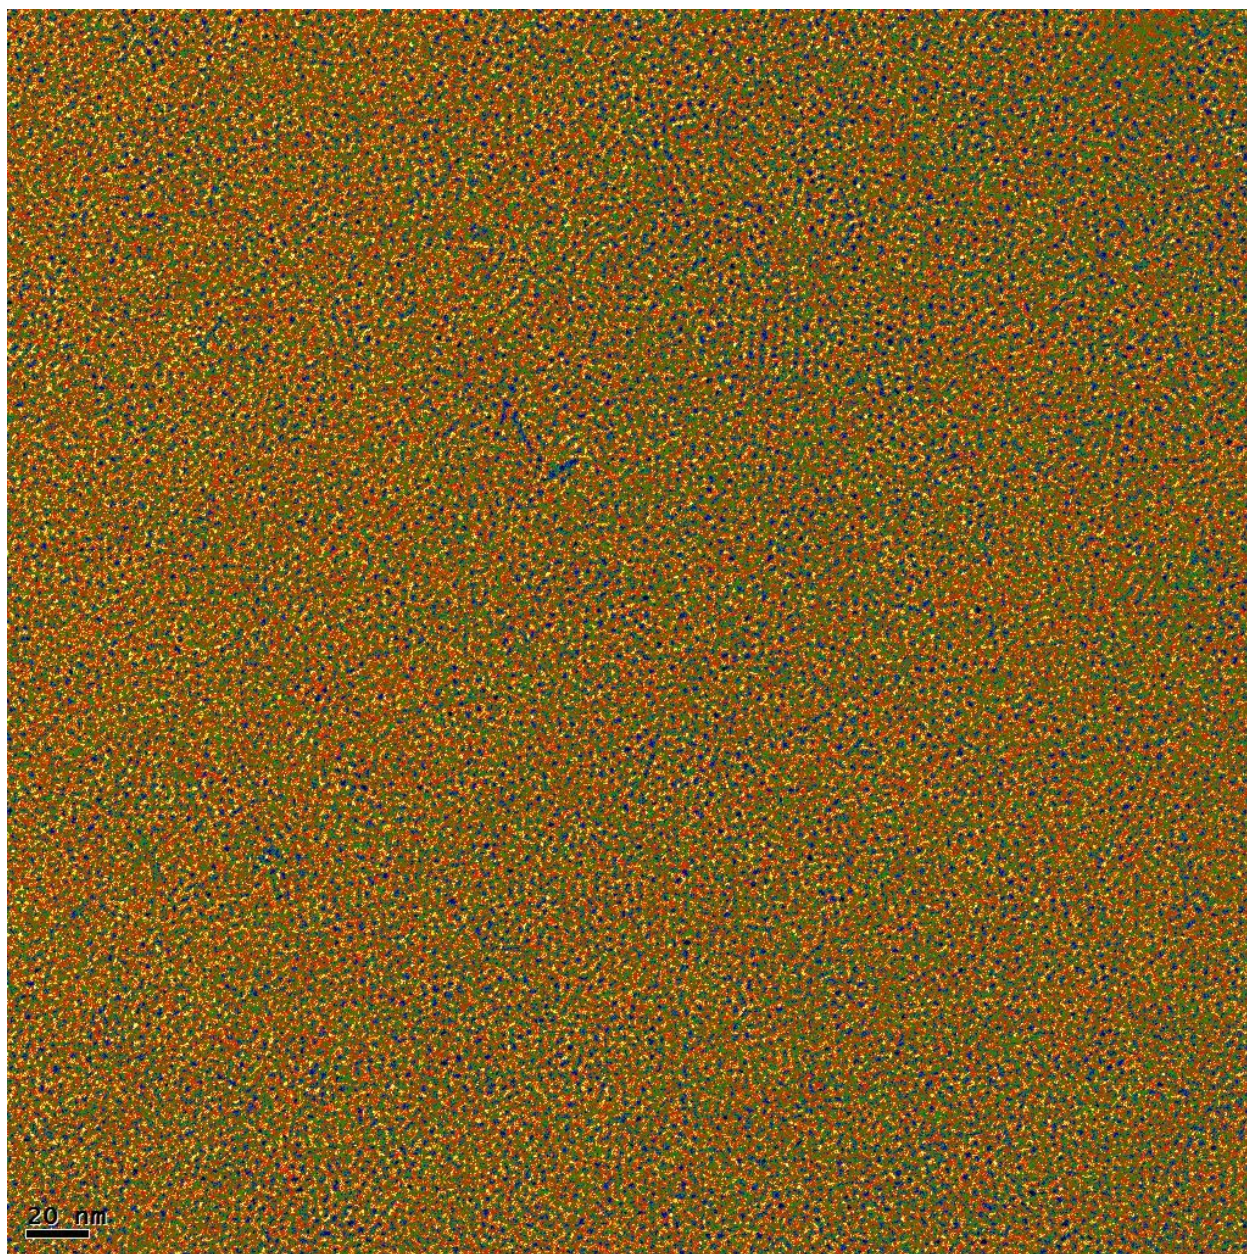

**Fig. S6** TEM image of InP core QDs synthesized with water. Color scheme has been changed to clearly show the InP QDs. The blue dots represent the InP QDs.



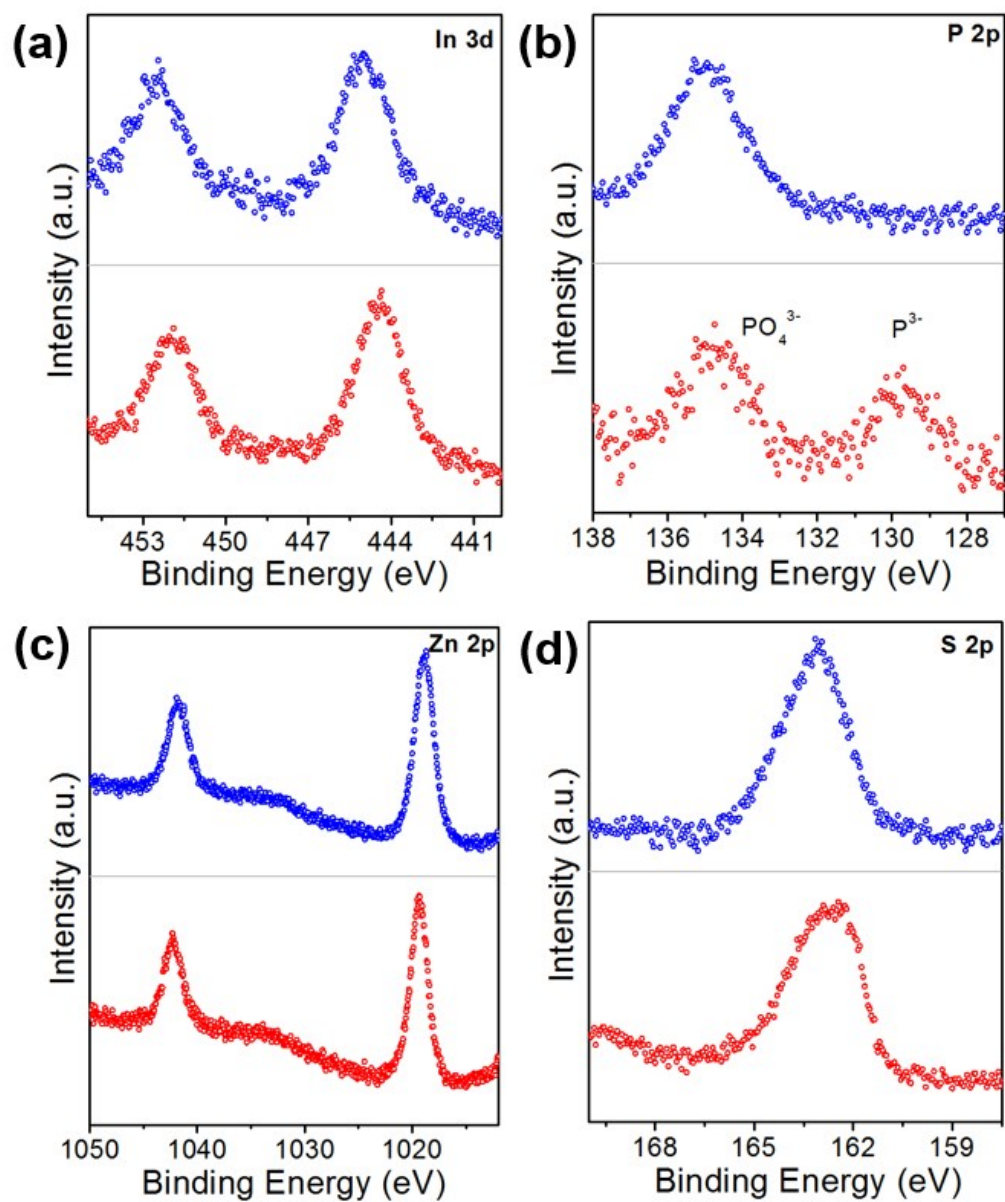

**Fig. S7** Comparison of (a) In 3d (b) P 2p (c) Zn 2p and (d) S 2p XPS spectra of InP/ZnS QDs synthesized with (blue lines) and without water (red lines).

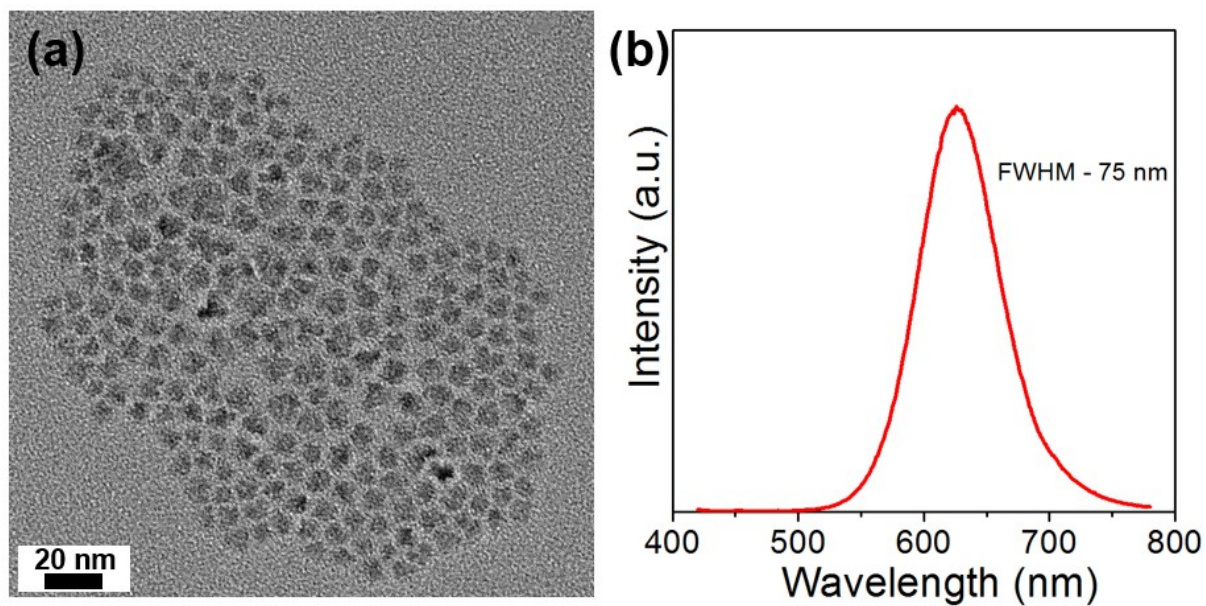

**Fig. S8** TEM images and PL spectra of larger InP/ZnS QDs synthesized without water. For the thick ZnS shell we doubled the Zn and S precursor concentration and three layer of ZnS was coated to obtain larger particles.

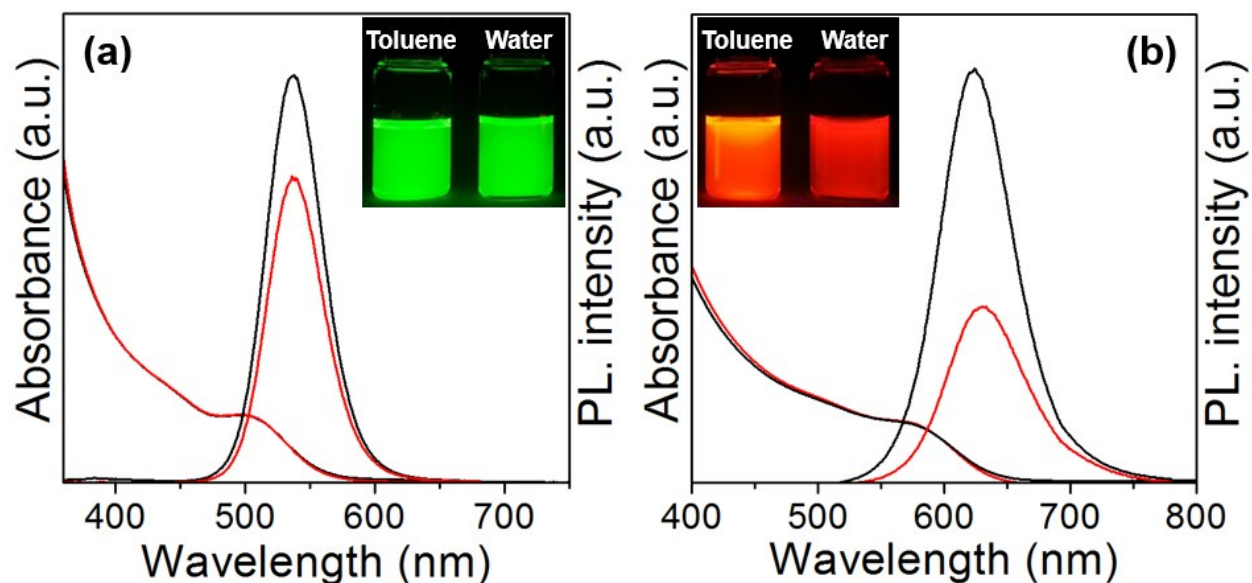

**Fig. S9** Absorption and photoluminescence spectra of InP/ZnS QDs before and after aqueous phase transfer using MPA. (a) InP/ZnS QDs synthesized with water and (b) InP/ZnS QDs synthesized without water. Black lines: spectra in toluene, Red lines: spectra recorded in water, the absorbance of the samples before and after phase transfer was adjusted to be equal. Insets show the luminescent photograph of QDs dispersed in toluene (SA capped) and water (MPA capped).



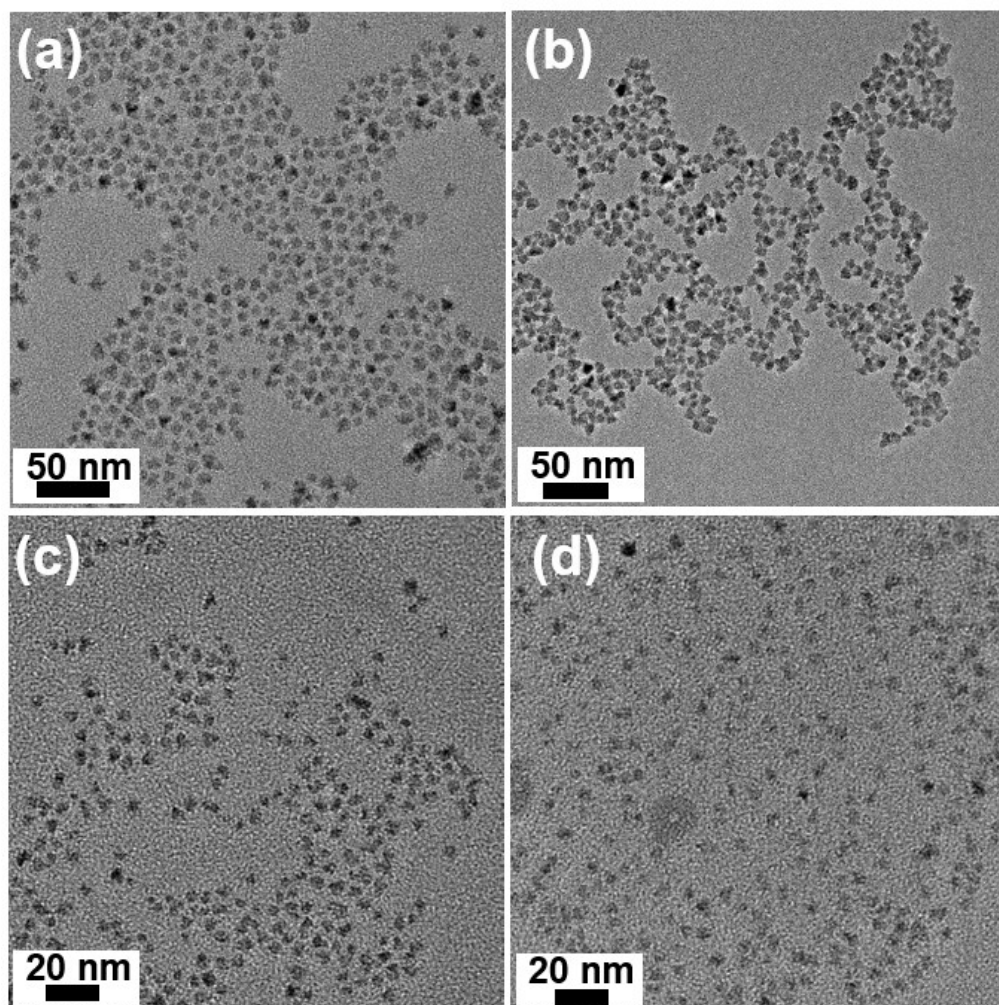

**Fig. S10** TEM images of InP/ZnS QDs before and after aqueous phase change reactions.

InP/ZnS QDs synthesized with water (a) before and (b) after phase change reaction. InP/ZnS QDs synthesized without water (c) before and (d) phase change reaction.

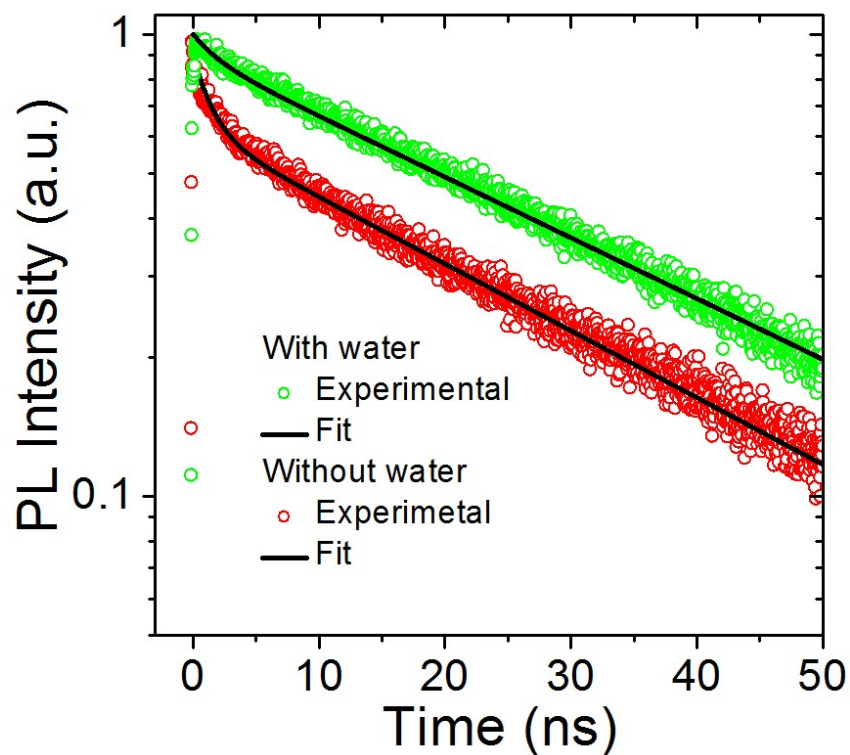

**Fig. S11** Time resolved PL decay of InP/ZnS QDs synthesized with and without water.

**Table S2.** Photoluminescence lifetime components and amplitudes of the exponential fit curves for InP/ZnS QDs synthesized with and without water

|               | Emission (nm) | A    | $\tau_1$ (ns) | B    | $\tau_2$ (ns) |
|---------------|---------------|------|---------------|------|---------------|
| With water    | 530           | 0.1  | 2             | 0.9  | 33            |
| Without water | 625           | 0.31 | 1.5           | 0.69 | 30            |

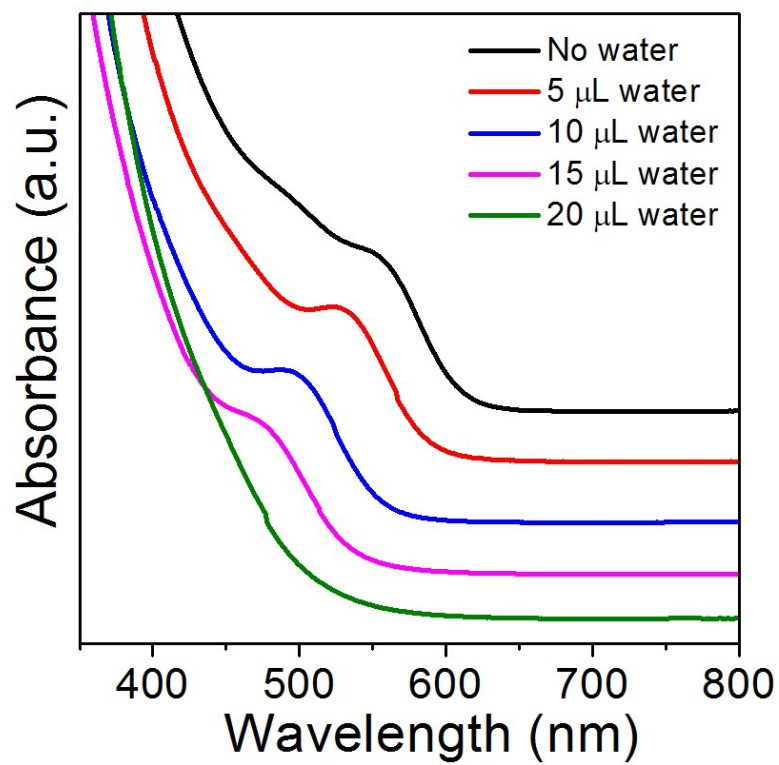

**Fig. S12** Absorption spectra of InP QDs synthesized with different amounts of water.

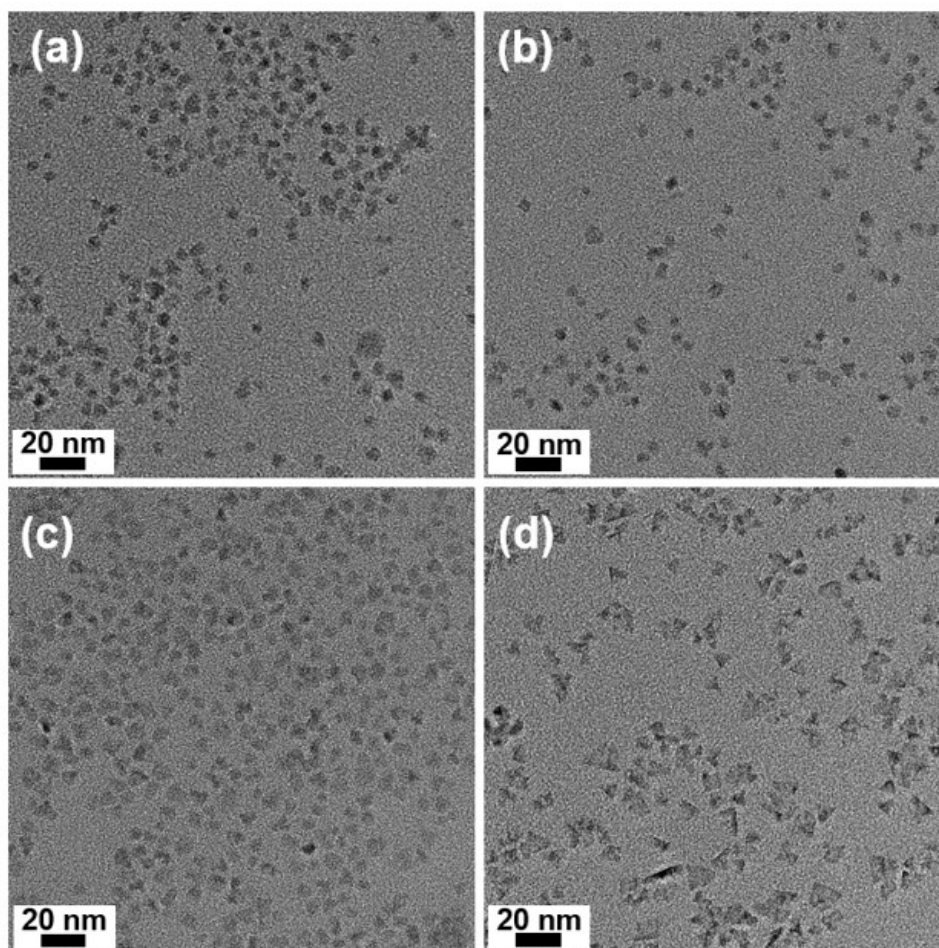

**Fig. S13** TEM images of InP/ZnS QDs synthesized with different amounts of water. (a) 5, (b) 10, (c) 15 and (d) 20  $\mu\text{L}$  water.



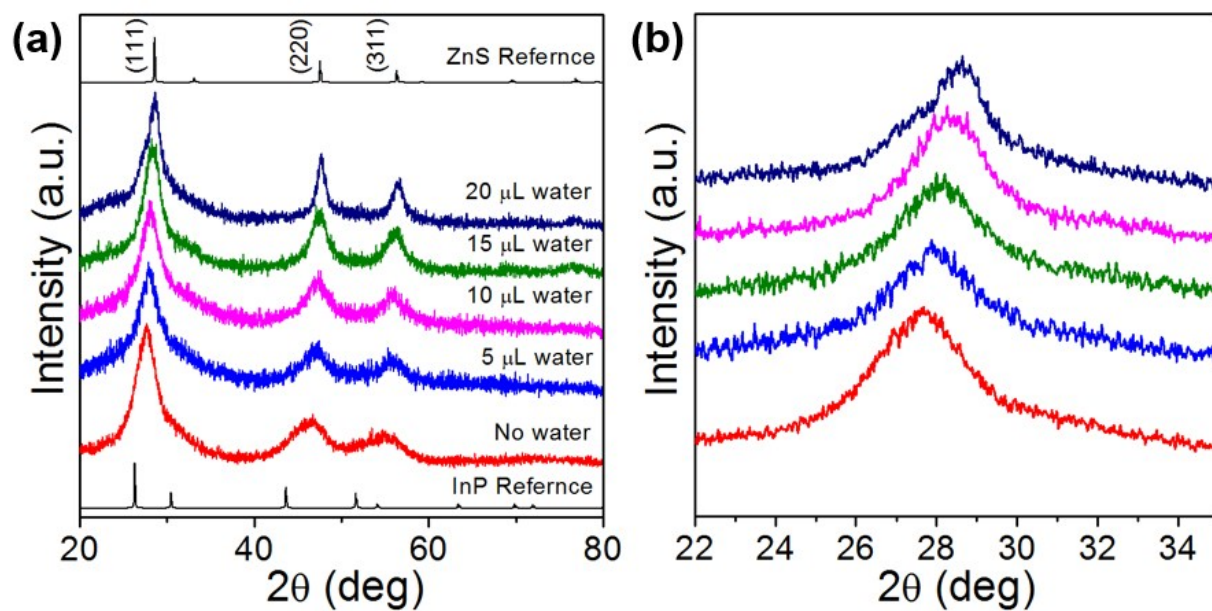

**Fig. S14** (a) XRD patterns of InP/ZnS QDs synthesized with different amount of water. (b) magnified (111) peak to clearly show the shift towards higher angle.
